# Supplementary material
Source: Springer Nature journal article supplement (https://www.springermedizin.de/resource/supplementary/12906_2012_1049_MOESM1_ESM.pdf/9520350)
Supplement: MOESM1 [file 9520350]

N=38 Assessed for eligibility

N=5 Excluded

- Not meeting inclusion criteria (n=2)
- Declined to participate (n=3)

N=33 Randomized

N=17 Allocated to Fiber-only

- Received intervention (n=17)
- Did not receive intervention (n=0)

N=16 Allocated to Synbiotic 2000

- Received intervention (n=16)
- Did not receive intervention (n=0)

N=4 Lost to follow-up

- Withdrew, reason not given (N=3)
- Withdrew due to antibiotics (N=1)

N=2 Lost to follow-up

- Withdrew due to antibiotics (N=2)

N=13 Per protocol

N=14 Per protocol
